# Supplementary material for: Optimising the safety case through transdisciplinary research?
Source: Copernicus journal article supplement (doi:10.5194/sand-2-187-2023), 2023-09-06
Supplement: Supplementary file 1 [file sand-2-187-2023-supplement.zip]

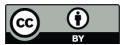

*Supplement of*

## **Optimising the safety case through transdisciplinary research?**

**Anne Eckhardt et al.**

*Correspondence to:* Anne Eckhardt ([anne.eckhardt@risicare.ch](mailto:anne.eckhardt@risicare.ch))

- [sand-2-187-2023-supplement-title-page.pdf](#)
- [sand-2023-29\\_Presentation.pdf](#)
- [sand-2023-29\\_Results.pdf](#)

The copyright of individual parts of the supplement might differ from the article licence.
