# Supplementary material for: Optimising the safety case through transdisciplinary research?
Source: Copernicus journal article supplement (doi:10.5194/sand-2-187-2023), 2023-09-06
Supplement: Supplementary file 3 [file sand-2-187-2023-supplement.zip]

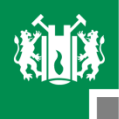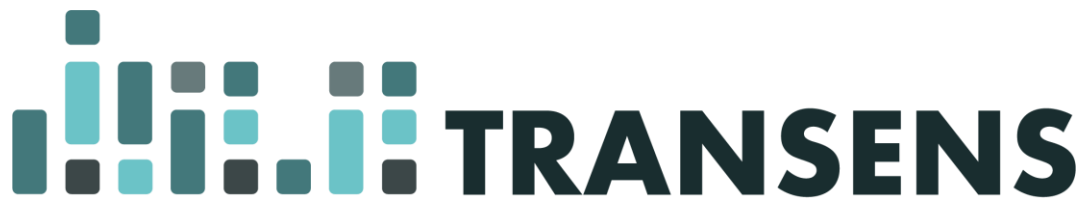

TRANSDISZIPLINÄRE FORSCHUNG ZUR ENTSORGUNG  
HOCHRADIOAKTIVER ABFÄLLE IN DEUTSCHLAND

# Optimizing the safety case through transdisciplinary research?

A. Eckhardt, M. Heiermann, D. Kluge, K.-J. Röhlig ...  
... and the TRANSENS TAP SAFE team

## TRANSENS: A transdisciplinary research project

- 1<sup>st</sup> large-scale transdisciplinary project on nuclear waste management in Germany
- 2019–2024, 16 partners from Germany and Switzerland
- Transdisciplinary research:
  - Methodology-driven scientific principle
  - Contributions to solving a societal problem (here: HLW / SNF management in Germany)
  - Involvement of non-specialists and actors from practice ...
  - ... and today: **you, the workshop attendees** 😊

## TRANSENS TAP SAFE: Theme corridor

- One of four Transdisciplinary Working Packages (TAP)
- Safety Case: Established tool and basis for decision-making in repository programmes (based on a variety of safety assessments)
- But also: Criticism of approaches, procedures and standards, which can become relevant in the German site selection process
- Research question:  
Can a **transdisciplinary approach** contribute to an **optimisation** of the Safety Case?

## Safety Case: Methodology & report compilation

- Supporting decisions in repository programmes by providing „multiple lines of evidence“
- Addressing technical feasibility, operational and post-closure safety
- Often: subject to peer reviews
- Today: focus on post-closure (long-term) safety

Long-term Safety Cases include:

- System description
- Derivation of scenarios
- Computer simulations, resulting in „indicator values“
- Synthesis, including:
  - Result compilation
  - Recommendations about how to proceed, including ways to address uncertainties

## Our plans for today (1/2)

- Four topics, four transdisciplinary formats
- Objectives:
  - For you: to become familiar with transdisciplinary research
  - For us: to gain insight from you, ...  
... your experiences, your knowledge, your values, your perspectives

## Our plans for today (2/2)

### Topics & transdisciplinary formats

1. Digital Safety Case – „sailboat“ format
2. **F**eatures, **E**vents & **P**rocesses – format „open silent discussion“
3. Benefits of extended peer communities – format “design thinking”
4. Indicators – format „anonymous silent discussion“

Many thanks to our supporters from the TAP SAFE team:

I. Hölzle, A. Kogiomtazidis, P. Krütli, S. Kuppler,  
U. Noseck, A. Othmer, W. Schulz, R. Seidl

## Topic #1: Digital Safety Case

- On paper, the Safety Case is an unwieldy stack of books
- Digital formats provide many opportunities for

- data accessibility
- structure
- review
- ...

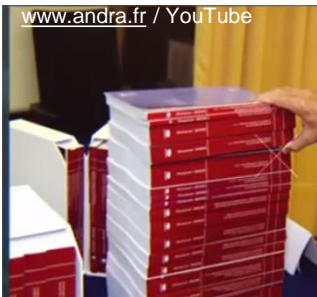

What we would like to know from you:

- What goals we could achieve by switching to a digital SC?
- What applications become possible?
- What hinders implementation?
- What are future risks?
- Which actors are involved?

## Topic #1: „sailboat“ format

- Brainstorming Method – quickly collects many ideas / inputs
- Creates a snapshot of the current situation
- Often used as a retrospective
- Visual template provides structure
- All individual inputs will be „heard“
- Trends may emerge
- Can be used as starting point to formulate action points

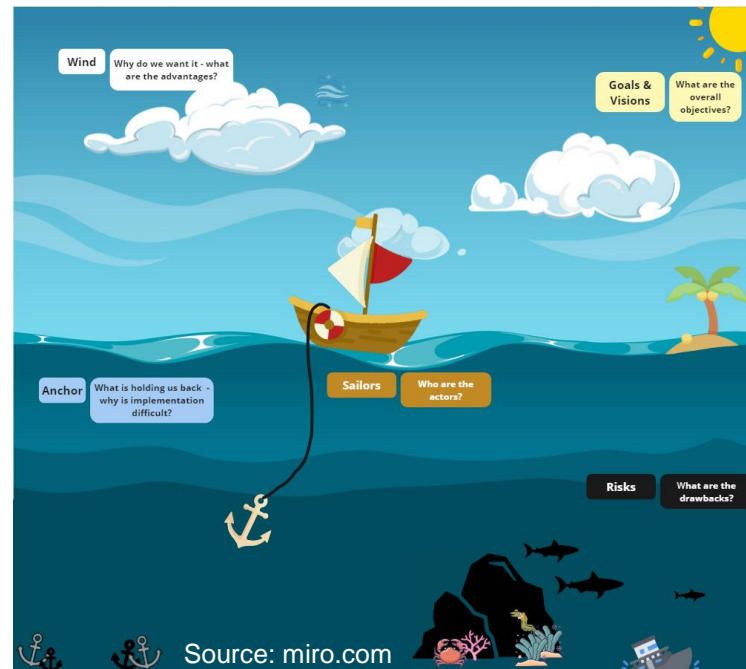



## Topic #2: Features, Events & Processes

- System description:
  - „How does it look like?“  
→ features (porosity, temperature, ... )
  - „What might happen?“  
→ (short-term) events (earthquakes, ...)
  - „How might it evolve?“  
→ (longer-lasting) processes (fluid flow, corrosion, ...)
- FEPs and their interactions:
  - Essential for constructing scenarios and computer simulations
  - Collected and processed in databases
- Our questions to you:
  - What can, what cannot FEP databases do and achieve?
  - Measures to overcome their deficiencies?

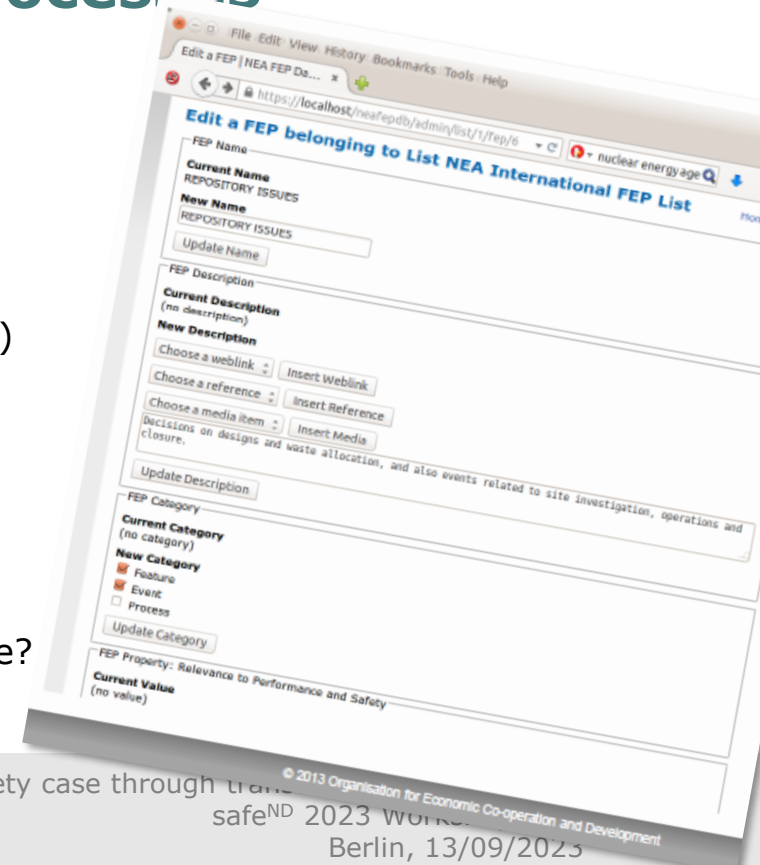

## Topic #2: Format „open silent discussion“

- As you might have experienced, oral discussions tend to be dominated by certain personality types
- As a consequence, not always the soundest arguments will „win“
- A way to empower the rather silent, thoughtful personalities:
  - Keep your mouth shut, but ...
  - ... express your thoughts by putting them down in writing on the flipchart
  - ... look at what others wrote. You might wish to supplement or comment!
  - **BUT again: Keep your mouth shut** 😊

## Topic #3: Extended Peer Reviews

- Can a specific Safety Case - complementary to classical peer reviews - be improved through reviews by extended peer communities?
- Reviews performed by persons outside the professional Safety Case community, e.g. archaeologists or industrial risk management professionals
- To obtain content-related and/or methodical impulses
- In order to strengthen the quality, legitimacy and acceptance of the Safety Case
- Research results from TRANSENS and a number of arguments based on scientific literature speak in favor of extended peer reviews.
- But: How to implement such an extended peer review?

## Topic #3: Format „Design Thinking“

- Development of a prototype for an extended peer review
- Implementation based on the „Design Thinking“ tool for transdisciplinary research
- Design of an extended peer review of the Safety Case
- Developing a narrating backwards from the successful outcome: How did it come about?

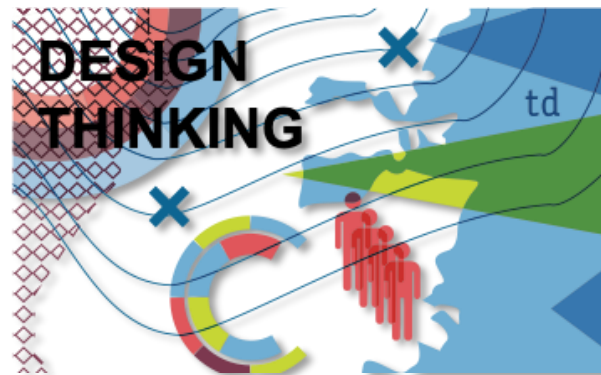

## Topic #4: Indicators

- In Safety Cases, many computer simulations are used, e.g. for ...
  - Corrosion processes  
→ Evolution of container outer shell
  - Radionuclide migration with groundwater  
→ Radionuclide concentrations in wells, lakes, rivers, ...
  - Radionuclide transfer & exposition  
→ dose to humans
- We consider the simulation outcomes as **indicators** for safety-related **messages**, e.g.:
  - The container remains tight
  - The radionuclide concentrations or doses are acceptable

- Questions to you: Please ...
  - **name** one (or more) indicators that should be used to assess the (long-term) safety of a nuclear repository,
  - and **rate** their suitability for this purpose.
  - What considerations influenced your rating(s)?

## Topic #4: Format „anonymous silent discussion“

- As you might have experienced, oral discussions tend to be dominated by certain personality types
- As a consequence, not always the soundest arguments will „win“
- A way to empower the rather silent, thoughtful personalities:
  - Keep your mouth shut, but ...
  - ... express your thoughts by putting them down in writing **on individual sheets**
  - ... **circulate** the sheets and look at what others wrote.  
You might wish to supplement or comment!
  - **BUT again: Keep your mouth shut** 😊

# Looking forward to the exchange with you!

## Questions?

Gefördert durch:

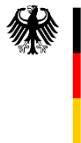

Bundesministerium  
für Umwelt, Naturschutz, nukleare Sicherheit  
und Verbraucherschutz

aufgrund eines Beschlusses  
des Deutschen Bundestages

Gefördert im  
Niedersächsischen Vorab der Volkswagenstiftung

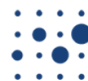

VolkswagenStiftung

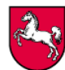

Niedersächsisches Ministerium  
für Wissenschaft und Kultur

Förderkennzeichen: 02E11849A-J

## After the coffee break...

| Topic                          | Format                      |
|--------------------------------|-----------------------------|
| Digital Safety Case            | Sailboat                    |
| Features, Events and Processes | Open Silent Discussion      |
| Extended Peer Reviews          | Design Thinking             |
| Indicators                     | Anonymous Silent Discussion |
